# Supplementary material for: Reversible luminescent humidity chromism of organic–inorganic hybrid PEA2MnBr4 single crystals
Source: Royal Society of Chemistry journal article supplement (doi:10.1039/d0dt00514b), 2020-01-01
Supplement: d0dt00514b1.pdf [file d0dt00514b1.pdf]

## Supporting Information

### Luminescent humidity chromism of organic-inorganic hybrid PEA<sub>2</sub>MnBr<sub>4</sub> single crystals

Wanru Gao, Meiyong Leng, Zhixiang Hu, Junze Li, Dehui Li, Huan Liu, Liang Gao\*,  
Guangda Niu, Jiang Tang

Sargent Joint Research Center, Wuhan National Laboratory for Optoelectronics  
(WNLO) and School of Optical and Electronic Information, Huazhong University of  
Science and Technology, Wuhan 430074, Hubei, People's Republic of China

\* Corresponding Author.

E-mail addresses: highlight@hust.edu.cn

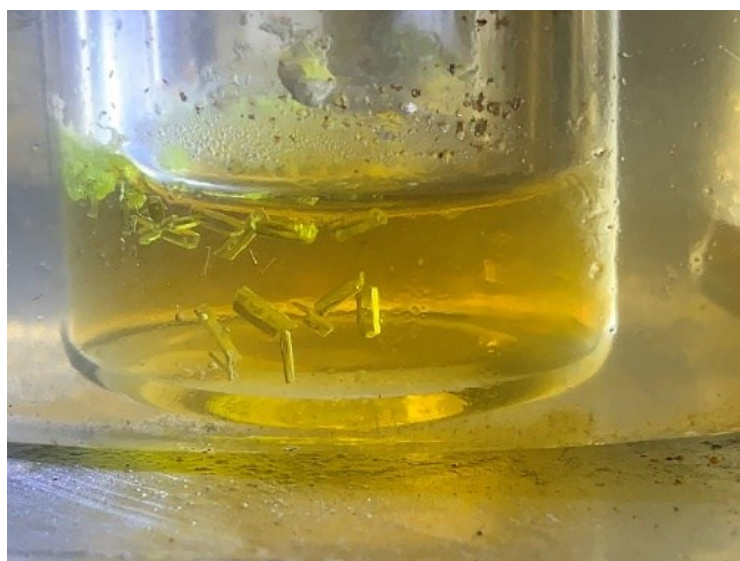

**Figure S1.** The photograph of PEA<sub>2</sub>MnBr<sub>4</sub> crystals grown by slow evaporation method.

**Table S1.** Crystallographic data of PEA<sub>2</sub>MnBr<sub>4</sub>.

|                                         |                                                                  |
|-----------------------------------------|------------------------------------------------------------------|
| Empirical formula                       | C <sub>16</sub> H <sub>22</sub> Br <sub>4</sub> MnN <sub>2</sub> |
| Formula weight                          | 616.92                                                           |
| Temperature/K                           | 273.00(10)                                                       |
| Crystal system                          | monoclinic                                                       |
| Space group                             | P2 <sub>1</sub> /c                                               |
| a/Å                                     | 7.7863(1)                                                        |
| b/Å                                     | 25.6928(1)                                                       |
| c/Å                                     | 11.0626(1)                                                       |
| $\alpha$ /°                             | 90                                                               |
| $\beta$ /°                              | 91.291(1)                                                        |
| $\gamma$ /°                             | 90                                                               |
| Volume/Å <sup>3</sup>                   | 2212.53(4)                                                       |
| Z                                       | 4                                                                |
| $\rho_{\text{calc}}$ g/cm <sup>3</sup>  | 1.852                                                            |
| $\mu$ /mm <sup>-1</sup>                 | 13.306                                                           |
| F(000)                                  | 1188.0                                                           |
| Data collection range/°                 | 3.44 < $\Theta$ < 73.899                                         |
| Index ranges                            | -9 ≤ h ≤ 9, -31 ≤ k ≤ 32, -13 ≤ l ≤ 13                           |
| Goodness-of-fit on F <sup>2</sup>       | 1.050                                                            |
| Final R indexes [ $I \geq 2\sigma(I)$ ] | R <sub>1</sub> = 0.0468, wR <sub>2</sub> = 0.1214                |
| Final R indexes [all data]              | R <sub>1</sub> = 0.0493, wR <sub>2</sub> = 0.1235                |

**Table S2.** Selected bond lengths and bond angles of PEA<sub>2</sub>MnBr<sub>4</sub>.

| Bond          | Length (Å) | Bond                 | Angle (°) |
|---------------|------------|----------------------|-----------|
| Br(01)-Mn(05) | 2.4957(9)  | Br(01)-Mn(05)-Br(02) | 106.41(4) |
| Br(02)-Mn(05) | 2.4994(9)  | Br(03)-Mn(05)-Br(01) | 111.70(4) |
| Br(03)-Mn(05) | 2.4769(9)  | Br(03)-Mn(05)-Br(02) | 105.20(3) |
| Br(04)-Mn(05) | 2.4859(10) | Br(03)-Mn(05)-Br(04) | 109.64(3) |
|               |            | Br(04)-Mn(05)-Br(01) | 111.90(4) |
|               |            | Br(04)-Mn(05)-Br(02) | 111.77(4) |

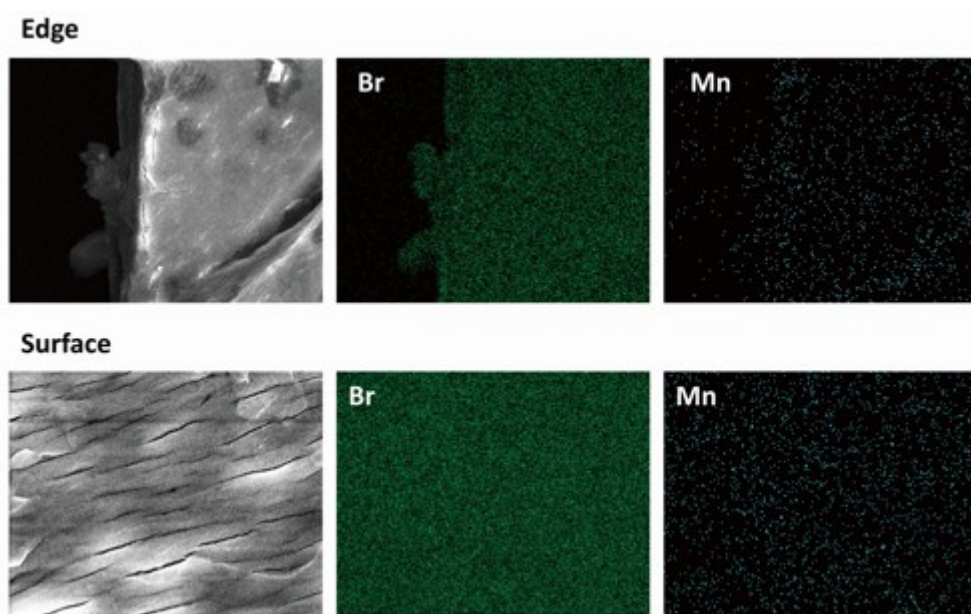

**Figure S2.** EDS mapping of PEA<sub>2</sub>MnBr<sub>4</sub> single crystal surface and edge.

**Table S3.** Elemental analysis by EDS of PEA<sub>2</sub>MnBr<sub>4</sub>.

| No. | Mn (%) | Br (%) | Total (%) |
|-----|--------|--------|-----------|
| 1   | 20.71  | 79.29  | 100       |
| 2   | 20.95  | 79.05  |           |

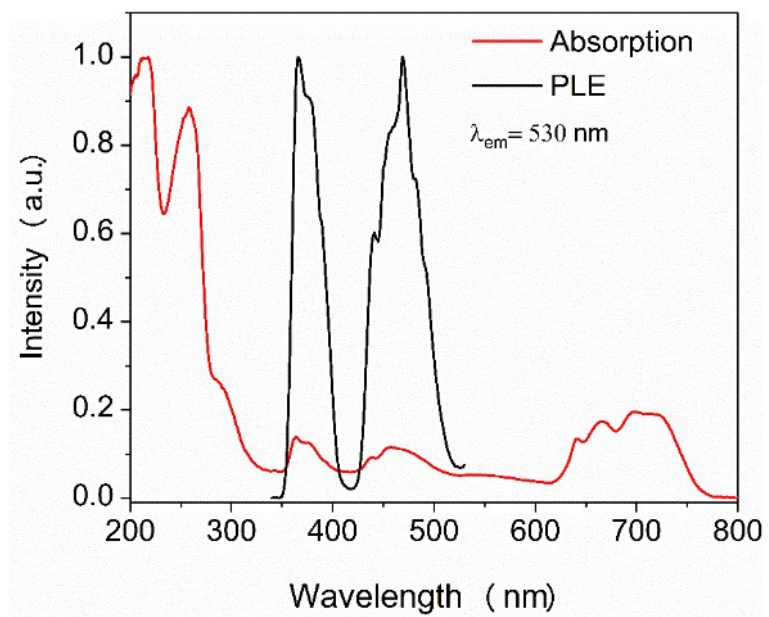

**Figure S3.** Absorption and excitation spectra of  $\text{PEA}_2\text{MnBr}_4$ .

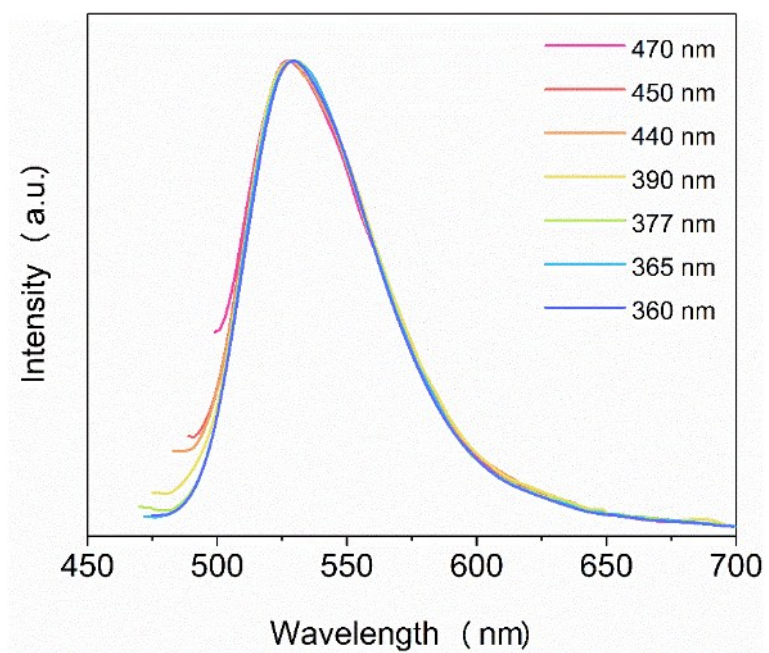

**Figure S4.** Excitation wavelength-dependent PL spectra of PEA<sub>2</sub>MnBr<sub>4</sub>.

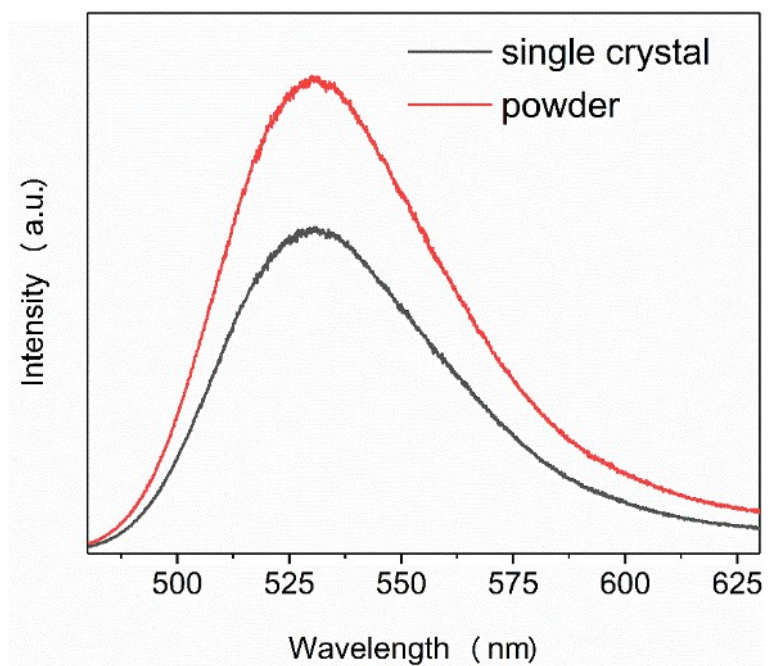

**Figure S5.** PL of PEA<sub>2</sub>MnBr<sub>4</sub> single crystals and ball-milled powder at room temperature.

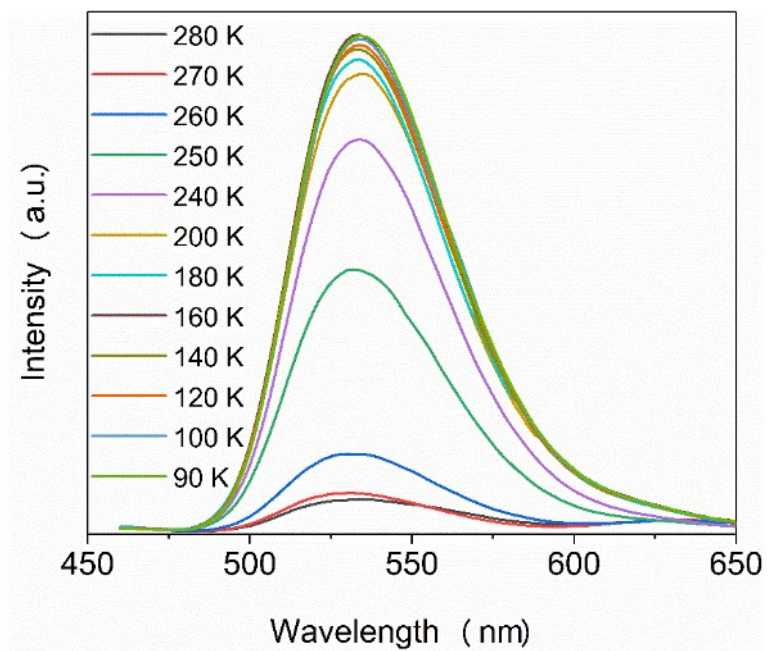

**Figure S6.** Temperature-dependent PL spectra of PEA<sub>2</sub>MnBr<sub>4</sub> single crystal.



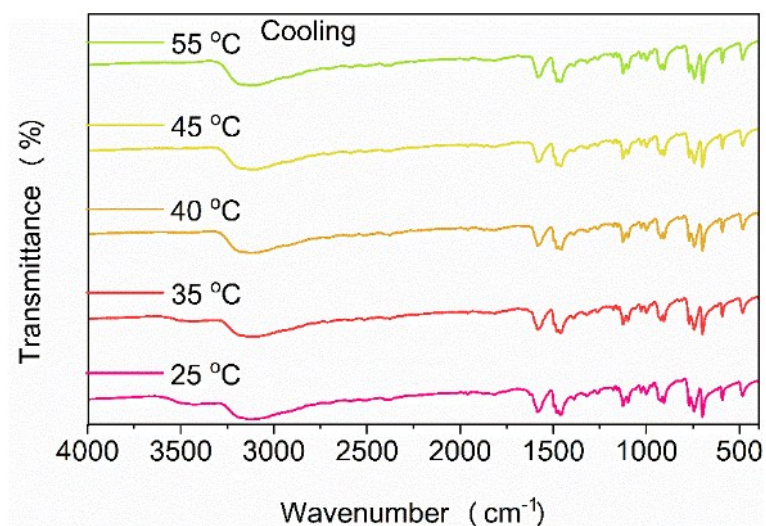

**Figure S7.** In-situ FTIR spectra of PEA<sub>2</sub>MnBr<sub>4</sub> recorded at different temperatures.

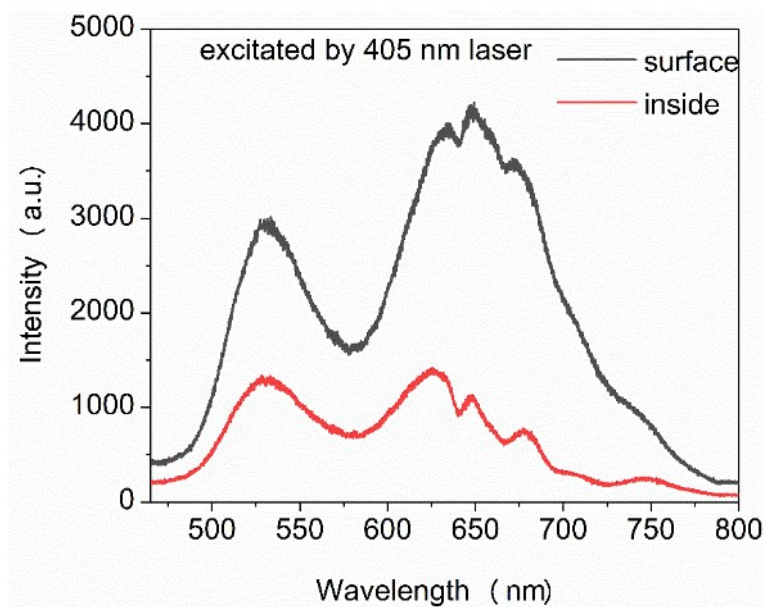

**Figure S8.** Surface and interior of  $\text{PEA}_2\text{MnBr}_4$  excited by 405 nm laser.

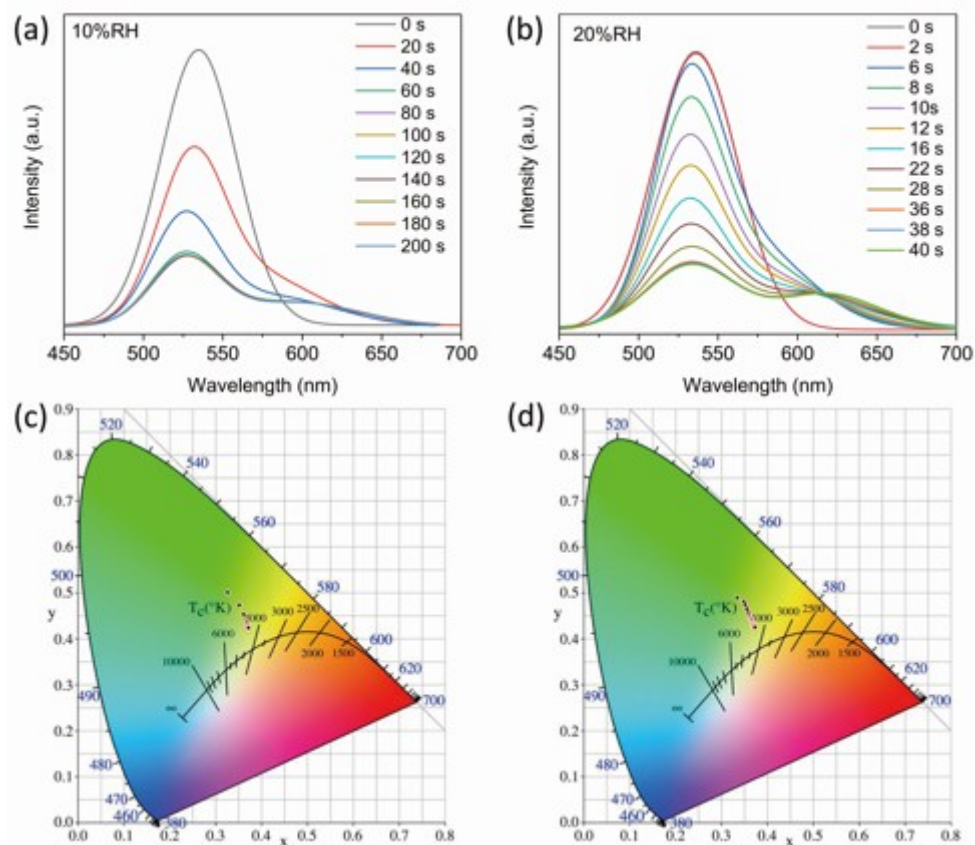

**Figure S9.** (a) and (b) PL spectra of dehydrated  $\text{PEA}_2\text{MnBr}_4$  recorded in real-time under exposing to air (10% RH and 20% RH). (c) and (d) Humidity-dependent CIE chromaticity diagram of dehydrated  $\text{PEA}_2\text{MnBr}_4$  under air (10% RH and 20% RH).

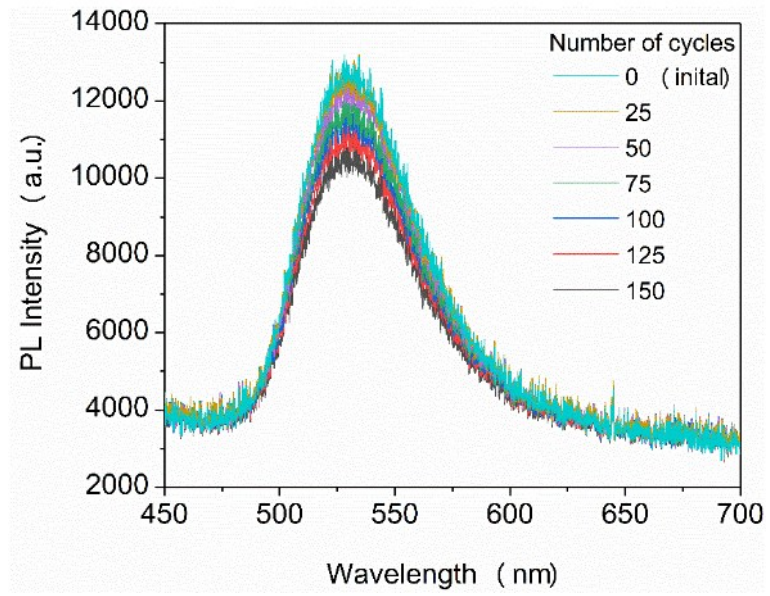

**Figure S10.** PL intensity along cycling of water adsorption and desorption.
